# Supplementary material
Source: Springer Nature journal article supplement (https://www.springermedizin.de/resource/supplementary/12881_2003_49_MOESM2_ESM.pdf/9452310)

Brain 19  
(fetal cerebrum)

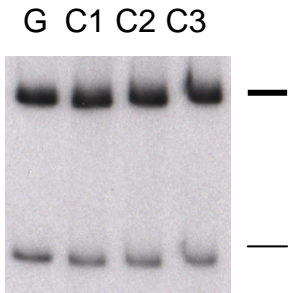

Brain 86  
(adult hippocampus; AD)

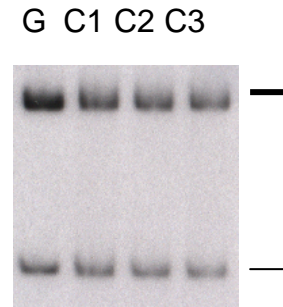

Brain 166  
(adult hippocampus; AD)

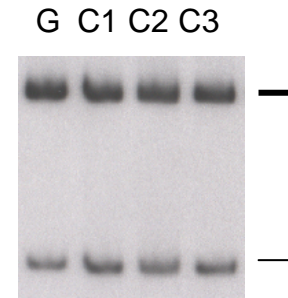

Brain 110  
(adult hippocampus; normal)

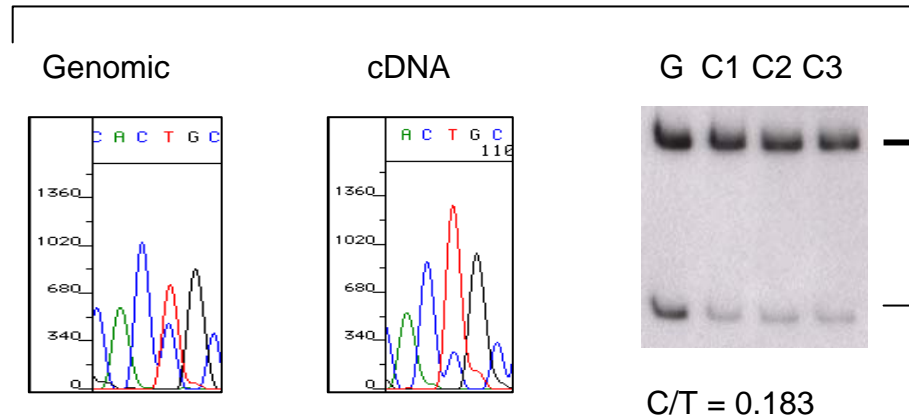

Supplement: MOESM2 [file 9452310]
